# Supplementary material for: Aerobic Microbial Respiration In Oceanic Oxygen Minimum Zones
Source: PubMed Central journal article supplement (PMC4507870; doi:10.1371/journal.pone.0133526), 2015-07-20
Supplement: pone.0133526.s002.pdf [file pone.0133526.s002.pdf]

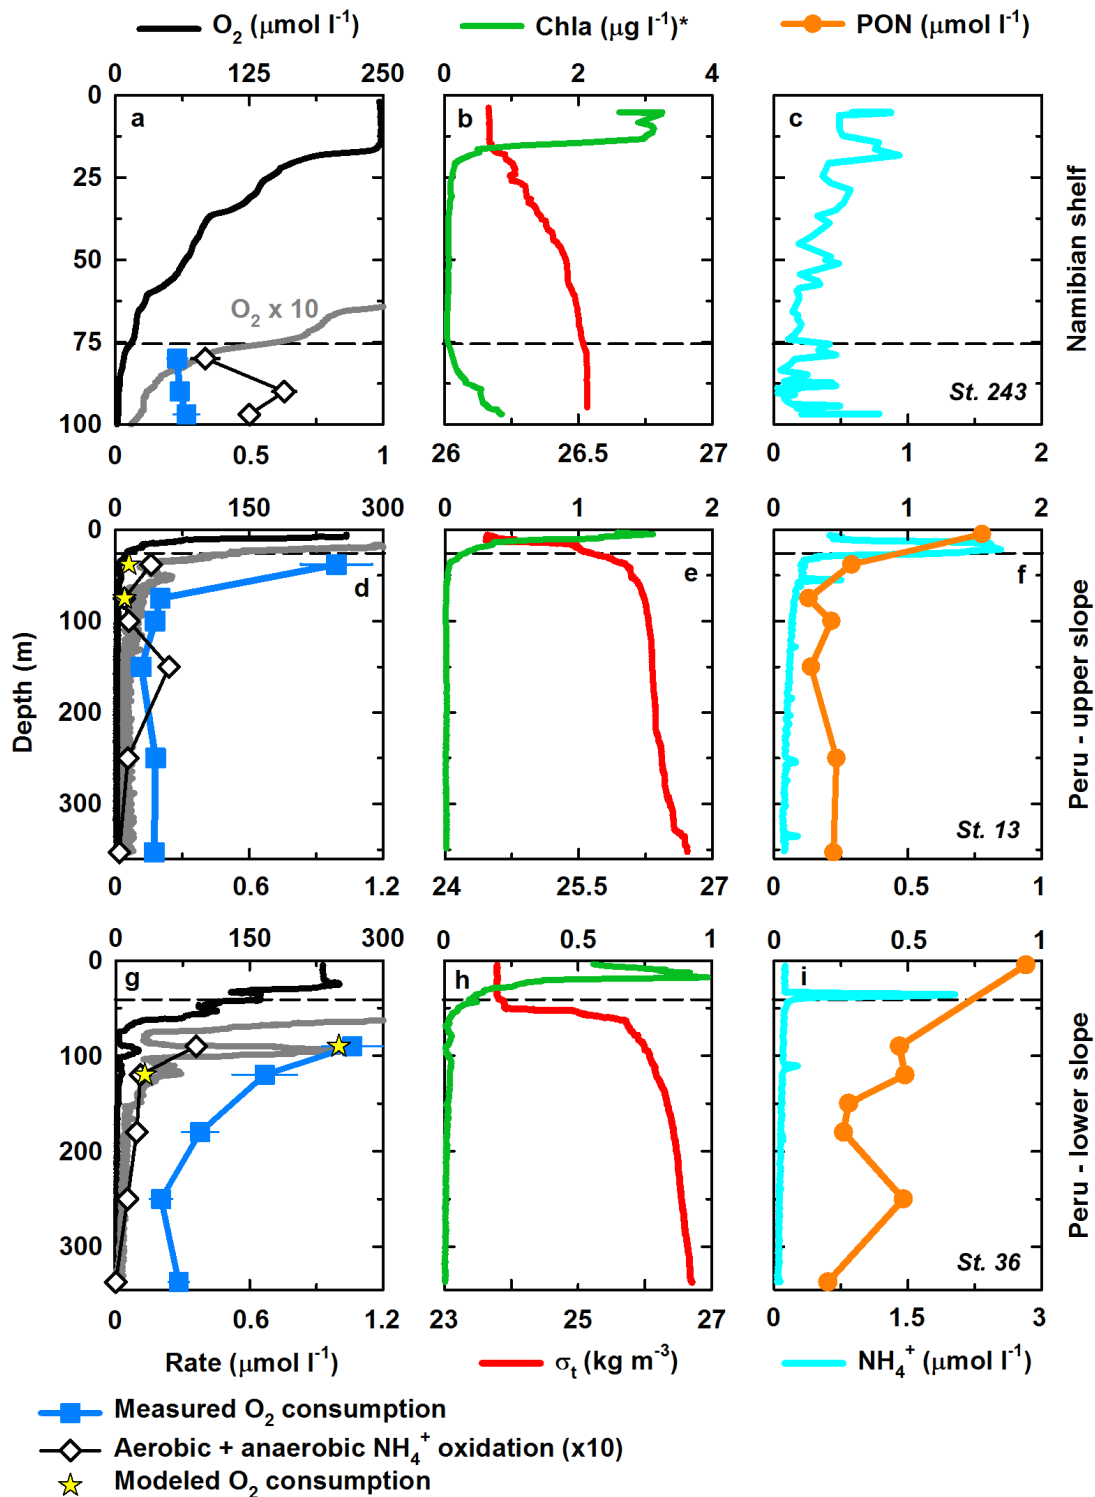

**S1 Figure. Physicochemical zonation and rates of microbial respiration in the OMZs off Namibia and Peru. a-c, Namibian shelf (station 243, 103 m). d-f, Upper Peruvian continental slope (station 13, 356 m). g-i, Lower Peruvian continental slope (station 36, 2845 m). Dashed lines indicate the upper OMZ boundary ( $O_2 \leq 15 \mu\text{mol l}^{-1}$ ). Rates of aerobic + anaerobic  $\text{NH}_4^+$  oxidation are 10 x magnified. \*Chlorophyll a concentrations in panel b in relative units.**
