# Supplementary material for: Aerobic Microbial Respiration In Oceanic Oxygen Minimum Zones
Source: PubMed Central journal article supplement (PMC4507870; doi:10.1371/journal.pone.0133526), 2015-07-20
Supplement: pone.0133526.s004.pdf [file pone.0133526.s004.pdf]

**S1 Table. Oxygen consumption rates in the OMZs off Namibia and Peru.** Adjusted <sup>18-18</sup>O<sub>2</sub> concentrations are given in the method section. The upper Peruvian OMZ is here loosely defined by O<sub>2</sub> ≥ 0.5 μmol l<sup>-1</sup>, except for station 805 where higher O<sub>2</sub> concentrations persisted throughout the OMZ. SE = standard error; n.a. = not available; b.d. = below detection; \* STOX sensor measurements.

| Cruise             | Station | Lat (°S) | Lon (°E) | Water depth (m) | Zone      | Sampled depth (m) | In-situ T (°C) | In-situ O <sub>2</sub> (μM) | Respiration rate (μM O <sub>2</sub> /d) | ± SE |
|--------------------|---------|----------|----------|-----------------|-----------|-------------------|----------------|-----------------------------|-----------------------------------------|------|
| M76-2<br>(Namibia) | 225     | 19.02    | 12.24    | 123             | OMZ       | 85                | 14.2           | 4.4                         | 0.45                                    | 0.06 |
|                    |         |          |          |                 |           | 90                | 13.9           | 4.1                         | 0.27                                    | 0.05 |
|                    |         |          |          |                 |           | 110               | 13.5           | 0.3                         | 0.29                                    | 0.07 |
|                    |         |          |          |                 | BBL       | 120.94            | n.a.           | n.a.                        | 0.26                                    | 0.03 |
|                    |         |          |          |                 |           | 121.88            | n.a.           | n.a.                        | 0.23                                    | 0.03 |
|                    |         |          |          |                 |           | 122.7             | n.a.           | n.a.                        | 0.22                                    | 0.05 |
|                    | 231     | 21.00    | 13.25    | 123             | OMZ       | 105               | 13.5           | 8.1                         | 0.14                                    | 0.04 |
|                    |         |          |          |                 |           | 115               | 13.4           | 5.9                         | 0.16                                    | 0.03 |
|                    |         |          |          |                 |           | 118               | 13.4           | 5.8                         | 0.14                                    | 0.02 |
|                    |         |          |          |                 | BBL       | 120.94            | n.a.           | n.a.                        | 0.20                                    | 0.03 |
|                    |         |          |          |                 |           | 121.88            | n.a.           | n.a.                        | 0.28                                    | 0.04 |
|                    |         |          |          |                 |           | 122.7             | n.a.           | n.a.                        | 0.35                                    | 0.09 |
|                    | 243     | 22.10    | 13.87    | 103             | OMZ       | 80                | 13.3           | 7.6                         | 0.23                                    | 0.04 |
|                    |         |          |          |                 |           | 90                | 13.3           | 2.9                         | 0.24                                    | 0.03 |
|                    |         |          |          |                 |           | 97                | 13.3           | 2.4                         | 0.26                                    | 0.05 |
|                    |         |          |          |                 | BBL       | 100.94            | n.a.           | n.a.                        | 0.19                                    | 0.06 |
| 101.88             |         |          |          |                 |           | n.a.              | n.a.           | 0.44                        | 0.08                                    |      |
| 102.7              |         |          |          |                 |           | n.a.              | n.a.           | 0.23                        | 0.05                                    |      |
| 252                | 23.00   | 14.23    | 111      | OMZ             | 76        | 12.8              | 1.1*           | 0.45                        | 0.04                                    |      |
|                    |         |          |          |                 | 95        | 12.6              | 0.0*           | 0.92                        | 0.31                                    |      |
|                    |         |          |          |                 | 105       | 12.6              | 0.0*           | 1.62                        | 0.20                                    |      |
|                    |         |          |          | BBL             | 108.94    | n.a.              | n.a.           | 1.47                        | 0.18                                    |      |
|                    |         |          |          |                 | 109.88    | n.a.              | n.a.           | 1.50                        | 0.32                                    |      |
|                    |         |          |          |                 | 110.7     | n.a.              | n.a.           | 1.26                        | 0.26                                    |      |
| M77-3<br>(Peru)    | 805     | 6.00     | -81.36   | 999             | upper OMZ | 62                | 14.8           | 7.5                         | 0.54                                    | 0.06 |
|                    |         |          |          |                 |           | 69                | 14.7           | 1.5                         | 0.34                                    | 0.08 |
|                    |         |          |          |                 | OMZ core  | 197               | 13.4           | 1.5                         | 0.26                                    | 0.07 |
|                    |         |          |          |                 |           | 345               | 10.6           | 0.6                         | 0.35                                    | 0.06 |
|                    | 807     | 10.00    | -78.38   | 115             | upper OMZ | 15                | 16.3           | ~20                         | 3.14                                    | 0.10 |
|                    |         |          |          |                 |           | 20                | 16.1           | 0.6                         | 0.49                                    | 0.05 |
|                    |         |          |          |                 |           | 40                | 14.9           | 0.0                         | 0.21                                    | 0.02 |
|                    |         |          |          |                 | OMZ core  | 60                | 14.6           | 0.0                         | 0.38                                    | 0.05 |
|                    |         |          |          |                 |           | 80                | 14.5           | 0.0                         | 0.28                                    | 0.02 |
|                    |         |          |          |                 |           | 110               | 14.5           | 0.0                         | 0.32                                    | 0.06 |
|                    | 811     | 10.00    | -78.97   | 145             | upper OMZ | 54                | 16.0           | 4.9                         | 0.61                                    | 0.15 |
|                    |         |          |          |                 |           | 80                | 14.9           | 0.0                         | b.d.                                    | -    |
|                    |         |          |          |                 | OMZ core  | 100               | 14.4           | 0.0                         | b.d.                                    | -    |
|                    |         |          |          |                 |           | 120               | 14.2           | 0.0                         | b.d.                                    | -    |
|                    |         |          |          |                 |           | 140               | 14.1           | 0.0                         | 0.18                                    | 0.04 |
|                    | 3       | 10.00    | -81.50   | 4697            | upper OMZ | 52                | 17.3           | 4.0                         | 1.19                                    | 0.11 |
|                    |         |          |          |                 |           | 70                | 16.0           | 1.5                         | 0.96                                    | 0.14 |
|                    |         |          |          |                 | OMZ core  | 95                | 15.0           | 0.2                         | 0.39                                    | 0.05 |
|                    |         |          |          |                 |           | 150               | 14.2           | 0.2                         | 0.27                                    | 0.07 |
|                    |         |          |          |                 |           | 300               | 12.4           | 0.0                         | b.d.                                    | -    |
|                    |         |          |          |                 |           | 365               | 11.1           | 0.0                         | b.d.                                    | -    |
|                    | 5       | 10.00    | -84.00   | 4525            | upper OMZ | 75                | 15.9           | 2.6                         | 0.73                                    | 0.07 |
|                    |         |          |          |                 |           | 110               | 14.3           | 0.4                         | 0.35                                    | 0.05 |
|                    |         |          |          |                 | OMZ core  | 150               | 13.5           | 0.1                         | 0.15                                    | 0.02 |
| 200                |         |          |          |                 |           | 12.9              | 0.0            | 0.24                        | 0.05                                    |      |
| 275                |         |          |          |                 |           | 12.1              | 0.0            | b.d.                        | -                                       |      |
| 362                |         |          |          |                 |           | 11.1              | 0.0            | b.d.                        | -                                       |      |
| 13                 | 12.03   | -77.79   | 356      | upper OMZ       | 38        | 15.7              | 3.4*           | 0.99                        | 0.16                                    |      |
|                    |         |          |          |                 | 75        | 14.6              | 0.0*           | 0.20                        | 0.04                                    |      |
|                    |         |          |          | OMZ core        | 100       | 14.3              | 0.0*           | 0.18                        | 0.04                                    |      |
|                    |         |          |          |                 | 150       | 14.0              | 0.0*           | 0.12                        | 0.01                                    |      |
|                    |         |          |          |                 | 250       | 13.4              | 0.1*           | 0.18                        | 0.02                                    |      |
|                    |         |          |          |                 | 353       | 11.7              | 0.0*           | 0.17                        | 0.02                                    |      |
| 36                 | 16.00   | -75.00   | 2845     | upper OMZ       | 90        | 14.6              | 1.5*           | 1.06                        | 0.14                                    |      |
|                    |         |          |          |                 | 120       | 13.5              | 1.2*           | 0.67                        | 0.15                                    |      |
|                    |         |          |          | OMZ core        | 180       | 12.8              | 0.0*           | 0.38                        | 0.08                                    |      |
|                    |         |          |          |                 | 250       | 12.0              | 0.0*           | 0.20                        | 0.05                                    |      |
|                    |         |          |          |                 | 337       | 10.9              | 0.0*           | 0.28                        | 0.05                                    |      |
