# Supplementary material for: Aerobic Microbial Respiration In Oceanic Oxygen Minimum Zones
Source: PubMed Central journal article supplement (PMC4507870; doi:10.1371/journal.pone.0133526), 2015-07-20
Supplement: pone.0133526.s005.pdf [file pone.0133526.s005.pdf]

**S2 Table. O<sub>2</sub> sensitivity assays in the OMZs off Namibia and Peru.** Adjusted O<sub>2</sub> concentrations (initial <sup>18-18</sup>O<sub>2</sub> + <sup>16-16</sup>O<sub>2</sub> background) were determined using either STOX sensors or Clark-type microsensors. Higher O<sub>2</sub> treatments often showed O<sub>2</sub> consumption rates tailing off between 12 - 24 h of incubation and only samples falling within the initial linear phase were considered for rate calculations, hence the larger uncertainties for these experiments. SE = standard error; b.d. = below detection; \* STOX sensor measurements.

| Cruise             | Station | Lat (°S) | Lon (°E) | Water depth (m) | Sampled depth (m) | In-situ T (°C) | In-situ O <sub>2</sub> (μM) | Adjusted O <sub>2</sub> (μM) | Respiration rate (μM O <sub>2</sub> /d) | ± SE |
|--------------------|---------|----------|----------|-----------------|-------------------|----------------|-----------------------------|------------------------------|-----------------------------------------|------|
| M76-2<br>(Namibia) | 225     | 19.02    | 12.24    | 123             | 90                | 13.9           | 4.1                         | 2.6                          | 0.27                                    | 0.05 |
|                    |         |          |          |                 |                   |                |                             | 6.1                          | 1.67                                    | 0.18 |
|                    |         |          |          |                 |                   |                |                             | 8.8                          | 4.71                                    | 0.91 |
|                    |         |          |          |                 |                   |                |                             | 12.5                         | 6.41                                    | 0.97 |
|                    |         |          |          |                 | 110               | 13.5           | 0.3                         | 2.5                          | 0.29                                    | 0.07 |
|                    |         |          |          |                 |                   |                |                             | 5.6                          | 3.93                                    | 0.51 |
|                    |         |          |          |                 |                   |                |                             | 10.4                         | 6.06                                    | 1.35 |
|                    |         |          |          |                 |                   |                |                             | 15.0                         | 8.35                                    | 0.54 |
| M77-3<br>(Peru)    | 13      | 12.03    | -77.79   | 356             | 75                | 14.6           | 0.0*                        | 0.5                          | b.d.                                    | -    |
|                    |         |          |          |                 |                   |                |                             | 1.2                          | 0.09                                    | 0.01 |
|                    |         |          |          |                 |                   |                |                             | 3.2                          | 0.20                                    | 0.04 |
|                    |         |          |          |                 |                   |                |                             | 8.3                          | 0.48                                    | 0.09 |
|                    |         |          |          |                 |                   |                |                             | 19.2                         | 1.46                                    | 0.28 |
|                    |         |          |          |                 | 353               | 11.7           | 0.0*                        | 0.7                          | b.d.                                    | -    |
|                    |         |          |          |                 |                   |                |                             | 1.6                          | 0.17                                    | 0.02 |
|                    |         |          |          |                 |                   |                |                             | 3.6                          | 0.30                                    | 0.03 |
|                    |         |          |          |                 |                   |                |                             | 8.0                          | 0.45                                    | 0.05 |
|                    |         |          |          |                 |                   |                |                             | 18.4                         | 0.90                                    | 0.09 |
|                    | 28      | 16.00    | -77.00   | 2352            | 357               | 11.7           | 0.0*                        | 1.0                          | b.d.                                    | -    |
|                    |         |          |          |                 |                   |                |                             | 1.5                          | 0.09                                    | 0.01 |
|                    |         |          |          |                 |                   |                |                             | 3.4                          | 0.14                                    | 0.01 |
|                    |         |          |          |                 |                   |                |                             | 7.4                          | 0.56                                    | 0.09 |
|                    |         |          |          |                 |                   |                |                             | 18.5                         | 1.19                                    | 0.24 |
