# Supplementary material for: Aerobic Microbial Respiration In Oceanic Oxygen Minimum Zones
Source: PubMed Central journal article supplement (PMC4507870; doi:10.1371/journal.pone.0133526), 2015-07-20
Supplement: pone.0133526.s006.pdf [file pone.0133526.s006.pdf]

**S3 Table. Abundance and taxonomic assignment of BLAST hits for low-affinity and high-affinity (bd and cbb<sub>3</sub>) cytochrome oxidases of metagenomes and metatranscriptomes from the South Pacific OMZ.**

| Peruvian OMZ Metagenome (M77-3, station 3 10.00°S/81.50°W) | Low-affinity cyt oxidase |                  |                 | Cyt bd oxidase |                  |                 | Cyt cbb <sub>3</sub> oxidase |                            |                 | All               |      |
|------------------------------------------------------------|--------------------------|------------------|-----------------|----------------|------------------|-----------------|------------------------------|----------------------------|-----------------|-------------------|------|
|                                                            | DNA hit count            | % of cyt ox hits | % of total hits | DNA hit count  | % of cyt bd hits | % of total hits | DNA hit count                | % of cbb <sub>3</sub> hits | % of total hits | % of all cyt hits |      |
| 50m                                                        | Alphaproteobacteria      | 111              | 27.8            | 0.0605         | 0                | 0.0             | 0.0000                       | 21                         | 52.5            | 0.0115            | 28.9 |
|                                                            | Betaproteobacteria       | 21               | 5.3             | 0.0115         | 2                | 12.5            | 0.0011                       | 0                          | 0.0             | 0.0000            | 5.0  |
|                                                            | Gammaproteobacteria      | 61               | 15.3            | 0.0333         | 7                | 43.8            | 0.0038                       | 13                         | 32.5            | 0.0071            | 17.8 |
|                                                            | Deltaproteobacteria      | 7                | 1.8             | 0.0038         | 0                | 0.0             | 0.0000                       | 0                          | 0.0             | 0.0000            | 1.5  |
|                                                            | Epsilonproteobacteria    | 1                | 0.3             | 0.0005         | 0                | 0.0             | 0.0000                       | 5                          | 12.5            | 0.0027            | 1.3  |
|                                                            | Archaea                  | 42               | 10.5            | 0.0229         | 0                | 0.0             | 0.0000                       | 0                          | 0.0             | 0.0000            | 9.2  |
|                                                            | Cyanobacteria            | 22               | 5.5             | 0.0120         | 0                | 0.0             | 0.0000                       | 0                          | 0.0             | 0.0000            | 4.8  |
|                                                            | Chlamydiae/Verrucom.     | 36               | 9.0             | 0.0196         | 0                | 0.0             | 0.0000                       | 0                          | 0.0             | 0.0000            | 7.9  |
|                                                            | Bacteroidetes/Chlorobi   | 37               | 9.3             | 0.0202         | 0                | 0.0             | 0.0000                       | 1                          | 2.5             | 0.0005            | 8.3  |
|                                                            | Gemmatimonadetes         | 5                | 1.3             | 0.0027         | 0                | 0.0             | 0.0000                       | 0                          | 0.0             | 0.0000            | 1.1  |
|                                                            | Planctomycetes           | 5                | 1.3             | 0.0027         | 5                | 31.3            | 0.0027                       | 0                          | 0.0             | 0.0000            | 2.2  |
|                                                            | Firmicutes               | 3                | 0.8             | 0.0016         | 0                | 0.0             | 0.0000                       | 0                          | 0.0             | 0.0000            | 0.7  |
|                                                            | Aquificae                | 1                | 0.3             | 0.0005         | 0                | 0.0             | 0.0000                       | 0                          | 0.0             | 0.0000            | 0.2  |
|                                                            | Actinobacteria           | 17               | 4.3             | 0.0093         | 0                | 0.0             | 0.0000                       | 0                          | 0.0             | 0.0000            | 3.7  |
|                                                            | Chloroflexi              | 7                | 1.8             | 0.0038         | 0                | 0.0             | 0.0000                       | 0                          | 0.0             | 0.0000            | 1.5  |
|                                                            | Nitrospirae              | 0                | 0.0             | 0.0000         | 2                | 12.5            | 0.0011                       | 0                          | 0.0             | 0.0000            | 0.4  |
|                                                            | Unknown/unclassified     | 24               | 6.0             | 0.0131         | 0                | 0.0             | 0.0000                       | 0                          | 0.0             | 0.0000            | 5.3  |
| Σ                                                          | 400                      | 100.0            | 0.2181          | 16             | 100.0            | 0.0087          | 40                           | 100.0                      | 0.0218          | 100.0             |      |
| 90m                                                        | Alphaproteobacteria      | 117              | 31.9            | 0.0612         | 7                | 18.9            | 0.0037                       | 48                         | 60.0            | 0.0251            | 35.5 |
|                                                            | Betaproteobacteria       | 19               | 5.2             | 0.0099         | 1                | 2.7             | 0.0005                       | 7                          | 8.8             | 0.0037            | 5.6  |
|                                                            | Gammaproteobacteria      | 52               | 14.2            | 0.0272         | 0                | 0.0             | 0.0000                       | 12                         | 15.0            | 0.0063            | 13.2 |
|                                                            | Deltaproteobacteria      | 26               | 7.1             | 0.0136         | 0                | 0.0             | 0.0000                       | 0                          | 0.0             | 0.0000            | 5.4  |
|                                                            | Epsilonproteobacteria    | 0                | 0.0             | 0.0000         | 0                | 0.0             | 0.0000                       | 2                          | 2.5             | 0.0010            | 0.4  |
|                                                            | Archaea                  | 11               | 3.0             | 0.0058         | 0                | 0.0             | 0.0000                       | 0                          | 0.0             | 0.0000            | 2.3  |
|                                                            | Cyanobacteria            | 11               | 3.0             | 0.0058         | 0                | 0.0             | 0.0000                       | 0                          | 0.0             | 0.0000            | 2.3  |
|                                                            | Chlamydiae/Verrucom.     | 41               | 11.2            | 0.0214         | 0                | 0.0             | 0.0000                       | 0                          | 0.0             | 0.0000            | 8.5  |
|                                                            | Bacteroidetes/Chlorobi   | 17               | 4.6             | 0.0089         | 0                | 0.0             | 0.0000                       | 4                          | 5.0             | 0.0021            | 4.3  |
|                                                            | Gemmatimonadetes         | 3                | 0.8             | 0.0016         | 0                | 0.0             | 0.0000                       | 0                          | 0.0             | 0.0000            | 0.6  |
|                                                            | Planctomycetes           | 5                | 1.4             | 0.0026         | 18               | 48.6            | 0.0094                       | 7                          | 8.8             | 0.0037            | 6.2  |
|                                                            | Firmicutes               | 9                | 2.5             | 0.0047         | 0                | 0.0             | 0.0000                       | 0                          | 0.0             | 0.0000            | 1.9  |
|                                                            | Aquificae                | 14               | 3.8             | 0.0073         | 0                | 0.0             | 0.0000                       | 0                          | 0.0             | 0.0000            | 2.9  |
|                                                            | Fibrobacteres            | 3                | 0.8             | 0.0016         | 0                | 0.0             | 0.0000                       | 0                          | 0.0             | 0.0000            | 0.6  |
|                                                            | Actinobacteria           | 10               | 2.7             | 0.0052         | 0                | 0.0             | 0.0000                       | 0                          | 0.0             | 0.0000            | 2.1  |
|                                                            | Chloroflexi              | 7                | 1.9             | 0.0037         | 0                | 0.0             | 0.0000                       | 0                          | 0.0             | 0.0000            | 1.4  |
|                                                            | Nitrospirae              | 0                | 0.0             | 0.0000         | 11               | 29.7            | 0.0058                       | 0                          | 0.0             | 0.0000            | 2.3  |
| Unknown/unclassified                                       | 22                       | 6.0              | 0.0115          | 0              | 0.0              | 0.0000          | 0                            | 0.0                        | 0.0000          | 4.5               |      |
| Σ                                                          | 367                      | 100.0            | 0.1919          | 37             | 100.0            | 0.0193          | 80                           | 100.0                      | 0.0418          | 100.0             |      |
| 150m                                                       | Alphaproteobacteria      | 183              | 35.5            | 0.0830         | 19               | 28.4            | 0.0086                       | 43                         | 43.4            | 0.0195            | 35.9 |
|                                                            | Betaproteobacteria       | 39               | 7.6             | 0.0177         | 1                | 1.5             | 0.0005                       | 5                          | 5.1             | 0.0023            | 6.6  |
|                                                            | Gammaproteobacteria      | 105              | 20.3            | 0.0476         | 4                | 6.0             | 0.0018                       | 17                         | 17.2            | 0.0077            | 18.5 |
|                                                            | Deltaproteobacteria      | 48               | 9.3             | 0.0218         | 0                | 0.0             | 0.0000                       | 0                          | 0.0             | 0.0000            | 7.0  |
|                                                            | Epsilonproteobacteria    | 0                | 0.0             | 0.0000         | 0                | 0.0             | 0.0000                       | 2                          | 2.0             | 0.0009            | 0.3  |
|                                                            | Archaea                  | 6                | 1.2             | 0.0027         | 0                | 0.0             | 0.0000                       | 0                          | 0.0             | 0.0000            | 0.9  |
|                                                            | Cyanobacteria            | 8                | 1.6             | 0.0036         | 0                | 0.0             | 0.0000                       | 0                          | 0.0             | 0.0000            | 1.2  |
|                                                            | Chlamydiae/Verrucom.     | 35               | 6.8             | 0.0159         | 0                | 0.0             | 0.0000                       | 1                          | 1.0             | 0.0005            | 5.3  |
|                                                            | Bacteroidetes/Chlorobi   | 21               | 4.1             | 0.0095         | 0                | 0.0             | 0.0000                       | 3                          | 3.0             | 0.0014            | 3.5  |
|                                                            | Gemmatimonadetes         | 3                | 0.6             | 0.0014         | 0                | 0.0             | 0.0000                       | 0                          | 0.0             | 0.0000            | 0.4  |
|                                                            | Planctomycetes           | 11               | 2.1             | 0.0050         | 33               | 49.3            | 0.0150                       | 28                         | 28.3            | 0.0127            | 10.6 |
|                                                            | Firmicutes               | 1                | 0.2             | 0.0005         | 0                | 0.0             | 0.0000                       | 0                          | 0.0             | 0.0000            | 0.1  |
|                                                            | Aquificae                | 18               | 3.5             | 0.0082         | 0                | 0.0             | 0.0000                       | 0                          | 0.0             | 0.0000            | 2.6  |
|                                                            | Fibrobacteres            | 11               | 2.1             | 0.0050         | 0                | 0.0             | 0.0000                       | 0                          | 0.0             | 0.0000            | 1.6  |
|                                                            | Actinobacteria           | 4                | 0.8             | 0.0018         | 0                | 0.0             | 0.0000                       | 0                          | 0.0             | 0.0000            | 0.6  |
|                                                            | Chloroflexi              | 3                | 0.6             | 0.0014         | 0                | 0.0             | 0.0000                       | 0                          | 0.0             | 0.0000            | 0.4  |
|                                                            | Nitrospirae              | 0                | 0.0             | 0.0000         | 7                | 10.4            | 0.0032                       | 0                          | 0.0             | 0.0000            | 1.0  |
| Unknown/unclassified                                       | 20                       | 3.9              | 0.0091          | 3              | 4.5              | 0.0014          | 0                            | 0.0                        | 0.0000          | 3.4               |      |
| Σ                                                          | 516                      | 100.0            | 0.2339          | 67             | 100.0            | 0.0304          | 99                           | 100.0                      | 0.0449          | 100.0             |      |

| Peruvian OMZ Metagenome (M77-3, station 3 10.00°S/81.50°W) |                        | Low-affinity cyt oxidase |                  |                 | Cyt bd oxidase |                  |                 | Cyt cbb <sub>3</sub> oxidase |                            |                 | All               |
|------------------------------------------------------------|------------------------|--------------------------|------------------|-----------------|----------------|------------------|-----------------|------------------------------|----------------------------|-----------------|-------------------|
|                                                            |                        | DNA hit count            | % of cyt ox hits | % of total hits | DNA hit count  | % of cyt bd hits | % of total hits | DNA hit count                | % of cbb <sub>3</sub> hits | % of total hits | % of all cyt hits |
| 380m                                                       | Alphaproteobacteria    | 276                      | 42.7             | 0.1134          | 26             | 37.1             | 0.0107          | 87                           | 73.7                       | 0.0357          | 46.6              |
|                                                            | Betaproteobacteria     | 60                       | 9.3              | 0.0247          | 0              | 0.0              | 0.0000          | 2                            | 1.7                        | 0.0008          | 7.4               |
|                                                            | Gammaproteobacteria    | 145                      | 22.4             | 0.0596          | 2              | 2.9              | 0.0008          | 11                           | 9.3                        | 0.0045          | 18.9              |
|                                                            | Deltaproteobacteria    | 34                       | 5.3              | 0.0140          | 0              | 0.0              | 0.0000          | 1                            | 0.8                        | 0.0004          | 4.2               |
|                                                            | Archaea                | 4                        | 0.6              | 0.0016          | 0              | 0.0              | 0.0000          | 0                            | 0.0                        | 0.0000          | 0.5               |
|                                                            | Cyanobacteria          | 4                        | 0.6              | 0.0016          | 0              | 0.0              | 0.0000          | 0                            | 0.0                        | 0.0000          | 0.5               |
|                                                            | Chlamydiae/Verrucom.   | 38                       | 5.9              | 0.0156          | 2              | 2.9              | 0.0008          | 1                            | 0.8                        | 0.0004          | 4.9               |
|                                                            | Bacteroidetes/Chlorobi | 18                       | 2.8              | 0.0074          | 0              | 0.0              | 0.0000          | 1                            | 0.8                        | 0.0004          | 2.3               |
|                                                            | Gemmatimonadetes       | 2                        | 0.3              | 0.0008          | 0              | 0.0              | 0.0000          | 0                            | 0.0                        | 0.0000          | 0.2               |
|                                                            | Planctomycetes         | 12                       | 1.9              | 0.0049          | 26             | 37.1             | 0.0107          | 15                           | 12.7                       | 0.0062          | 6.4               |
|                                                            | Aquificae              | 22                       | 3.4              | 0.0090          | 0              | 0.0              | 0.0000          | 0                            | 0.0                        | 0.0000          | 2.6               |
|                                                            | Fibrobacteres          | 1                        | 0.2              | 0.0004          | 0              | 0.0              | 0.0000          | 0                            | 0.0                        | 0.0000          | 0.1               |
|                                                            | Actinobacteria         | 6                        | 0.9              | 0.0025          | 0              | 0.0              | 0.0000          | 0                            | 0.0                        | 0.0000          | 0.7               |
|                                                            | Chloroflexi            | 2                        | 0.3              | 0.0008          | 0              | 0.0              | 0.0000          | 0                            | 0.0                        | 0.0000          | 0.2               |
|                                                            | Nitrospirae            | 0                        | 0.0              | 0.0000          | 10             | 14.3             | 0.0041          | 0                            | 0.0                        | 0.0000          | 1.2               |
| Unknown/unclassified                                       | 22                     | 3.4                      | 0.0090           | 4               | 5.7            | 0.0016           | 0               | 0.0                          | 0.0000                     | 3.1             |                   |
|                                                            | Σ                      | 646                      | 100.0            | 0.2654          | 70             | 100.0            | 0.0288          | 118                          | 100.0                      | 0.0485          | 100.0             |

| Chilean OMZ Metagenome (MOOMZ-1, station 3 20.12°S/70.38°W) |                        | Low-affinity cyt oxidase |                  |                 | Cyt bd oxidase |                  |                 | Cyt cbb <sub>3</sub> oxidase |                            |                 | All               |
|-------------------------------------------------------------|------------------------|--------------------------|------------------|-----------------|----------------|------------------|-----------------|------------------------------|----------------------------|-----------------|-------------------|
|                                                             |                        | DNA hit count            | % of cyt ox hits | % of total hits | DNA hit count  | % of cyt bd hits | % of total hits | DNA hit count                | % of cbb <sub>3</sub> hits | % of total hits | % of all cyt hits |
| 50m                                                         | Alphaproteobacteria    | 173                      | 32.9             | 0.0846          | 1              | 50.0             | 0.0005          | 25                           | 80.9                       | 0.0124          | 35.7              |
|                                                             | Betaproteobacteria     | 10                       | 1.9              | 0.0048          | 0              | 0.0              | 0.0000          | 3                            | 9.6                        | 0.0015          | 2.3               |
|                                                             | Gammaproteobacteria    | 74                       | 14.0             | 0.0360          | 0              | 0.0              | 0.0000          | 2                            | 6.4                        | 0.0010          | 13.5              |
|                                                             | Deltaproteobacteria    | 12                       | 2.3              | 0.0059          | 0              | 0.0              | 0.0000          | 0                            | 0.0                        | 0.0000          | 2.1               |
|                                                             | Epsilonproteobacteria  | 0                        | 0.0              | 0.0000          | 0              | 0.0              | 0.0000          | 1                            | 3.2                        | 0.0005          | 0.2               |
|                                                             | Archaea                | 41                       | 7.7              | 0.0198          | 0              | 0.0              | 0.0000          | 0                            | 0.0                        | 0.0000          | 7.2               |
|                                                             | Cyanobacteria          | 18                       | 3.4              | 0.0088          | 0              | 0.0              | 0.0000          | 0                            | 0.0                        | 0.0000          | 3.2               |
|                                                             | Chlamydiae/Verrucom.   | 66                       | 12.4             | 0.0320          | 0              | 0.0              | 0.0000          | 0                            | 0.0                        | 0.0000          | 11.7              |
|                                                             | Bacteroidetes/Chlorobi | 46                       | 8.7              | 0.0223          | 0              | 0.0              | 0.0000          | 0                            | 0.0                        | 0.0000          | 8.1               |
|                                                             | Gemmatimonadetes       | 4                        | 0.8              | 0.0020          | 0              | 0.0              | 0.0000          | 0                            | 0.0                        | 0.0000          | 0.7               |
|                                                             | Planctomycetes         | 13                       | 2.5              | 0.0063          | 1              | 50.0             | 0.0005          | 0                            | 0.0                        | 0.0000          | 2.5               |
|                                                             | Firmicutes             | 7                        | 1.3              | 0.0034          | 0              | 0.0              | 0.0000          | 0                            | 0.0                        | 0.0000          | 1.2               |
|                                                             | Actinobacteria         | 10                       | 1.9              | 0.0049          | 0              | 0.0              | 0.0000          | 0                            | 0.0                        | 0.0000          | 1.8               |
|                                                             | Chloroflexi            | 20                       | 3.8              | 0.0098          | 0              | 0.0              | 0.0000          | 0                            | 0.0                        | 0.0000          | 3.6               |
|                                                             | Deinococcus-Thermus    | 3                        | 0.6              | 0.0015          | 0              | 0.0              | 0.0000          | 0                            | 0.0                        | 0.0000          | 0.5               |
| Acidobacteria                                               | 4                      | 0.8                      | 0.0020           | 0               | 0.0            | 0.0000           | 0               | 0.0                          | 0.0000                     | 0.7             |                   |
| Unknown/unclassified                                        | 27                     | 5.2                      | 0.0133           | 0               | 0.0            | 0.0000           | 0               | 0.0                          | 0.0000                     | 4.9             |                   |
|                                                             | Σ                      | 527                      | 100.0            | 0.2572          | 2              | 100.0            | 0.0010          | 31                           | 100.0                      | 0.0153          | 100.0             |
| 85m                                                         | Alphaproteobacteria    | 355                      | 34.3             | 0.1041          | 0              | 0.0              | 0.0000          | 91                           | 66.8                       | 0.0266          | 37.7              |
|                                                             | Betaproteobacteria     | 72                       | 7.0              | 0.0212          | 0              | 0.0              | 0.0000          | 18                           | 13.2                       | 0.0052          | 7.6               |
|                                                             | Gammaproteobacteria    | 140                      | 13.6             | 0.0411          | 1              | 4.8              | 0.0001          | 11                           | 8.3                        | 0.0033          | 12.9              |
|                                                             | Deltaproteobacteria    | 20                       | 2.0              | 0.0060          | 0              | 0.0              | 0.0000          | 0                            | 0.0                        | 0.0000          | 1.7               |
|                                                             | Epsilonproteobacteria  | 0                        | 0.0              | 0.0000          | 0              | 0.0              | 0.0000          | 8                            | 5.9                        | 0.0023          | 0.7               |
|                                                             | Archaea                | 98                       | 9.5              | 0.0288          | 0              | 0.0              | 0.0000          | 0                            | 0.0                        | 0.0000          | 8.3               |
|                                                             | Cyanobacteria          | 16                       | 1.5              | 0.0045          | 0              | 0.0              | 0.0000          | 0                            | 0.0                        | 0.0000          | 1.3               |
|                                                             | Chlamydiae/Verrucom.   | 133                      | 12.8             | 0.0390          | 0              | 0.0              | 0.0000          | 2                            | 1.5                        | 0.0006          | 11.4              |
|                                                             | Bacteroidetes/Chlorobi | 50                       | 4.8              | 0.0146          | 0              | 0.0              | 0.0000          | 3                            | 2.2                        | 0.0009          | 4.5               |
|                                                             | Gemmatimonadetes       | 5                        | 0.5              | 0.0016          | 0              | 0.0              | 0.0000          | 0                            | 0.0                        | 0.0000          | 0.5               |
|                                                             | Planctomycetes         | 23                       | 2.3              | 0.0068          | 10             | 95.2             | 0.0029          | 3                            | 2.2                        | 0.0009          | 3.1               |
|                                                             | Firmicutes             | 17                       | 1.7              | 0.0051          | 0              | 0.0              | 0.0000          | 0                            | 0.0                        | 0.0000          | 1.5               |
|                                                             | Aquificae              | 13                       | 1.3              | 0.0038          | 0              | 0.0              | 0.0000          | 0                            | 0.0                        | 0.0000          | 1.1               |
|                                                             | Actinobacteria         | 8                        | 0.8              | 0.0023          | 0              | 0.0              | 0.0000          | 0                            | 0.0                        | 0.0000          | 0.7               |
|                                                             | Chloroflexi            | 30                       | 2.8              | 0.0086          | 0              | 0.0              | 0.0000          | 0                            | 0.0                        | 0.0000          | 2.5               |
| Deinococcus-Thermus                                         | 4                      | 0.4                      | 0.0012           | 0               | 0.0            | 0.0000           | 0               | 0.0                          | 0.0000                     | 0.3             |                   |

| Chilean OMZ Metagenome (MOOMZ-1, station 3 20.12°S/70.38°W) |                        | Low-affinity cyt oxidase |                  |                 | Cyt bd oxidase |                  |                 | Cyt cbb <sub>3</sub> oxidase |                            |                 | All               |
|-------------------------------------------------------------|------------------------|--------------------------|------------------|-----------------|----------------|------------------|-----------------|------------------------------|----------------------------|-----------------|-------------------|
|                                                             |                        | DNA hit count            | % of cyt ox hits | % of total hits | DNA hit count  | % of cyt bd hits | % of total hits | DNA hit count                | % of cbb <sub>3</sub> hits | % of total hits | % of all cyt hits |
| 85m                                                         | Acidobacteria          | 8                        | 0.7              | 0.0022          | 0              | 0.0              | 0.0000          | 0                            | 0.0                        | 0.0000          | 0.6               |
|                                                             | Lentisphaera           | 5                        | 0.5              | 0.0015          | 0              | 0.0              | 0.0000          | 0                            | 0.0                        | 0.0000          | 0.4               |
|                                                             | Spirochaetes           | 5                        | 0.4              | 0.0013          | 0              | 0.0              | 0.0000          | 0                            | 0.0                        | 0.0000          | 0.4               |
|                                                             | Unknown/unclassified   | 34                       | 3.3              | 0.0099          | 0              | 0.0              | 0.0000          | 0                            | 0.0                        | 0.0000          | 2.9               |
|                                                             | Σ                      | 1036                     | 100.0            | 0.3036          | 11             | 100.0            | 0.0031          | 136                          | 100.0                      | 0.0399          | 100.0             |
| 110m                                                        | Alphaproteobacteria    | 265                      | 31.4             | 0.1231          | 0              | 0.0              | 0.0000          | 33                           | 49.8                       | 0.0155          | 31.9              |
|                                                             | Betaproteobacteria     | 60                       | 7.1              | 0.0277          | 0              | 0.0              | 0.0000          | 10                           | 14.2                       | 0.0044          | 7.4               |
|                                                             | Gammaproteobacteria    | 138                      | 16.3             | 0.0639          | 2              | 8.3              | 0.0009          | 9                            | 13.5                       | 0.0042          | 15.9              |
|                                                             | Deltaproteobacteria    | 37                       | 4.3              | 0.0170          | 0              | 0.0              | 0.0000          | 0                            | 0.0                        | 0.0000          | 3.9               |
|                                                             | Epsilonproteobacteria  | 0                        | 0.0              | 0.0000          | 0              | 0.0              | 0.0000          | 1                            | 1.5                        | 0.0005          | 0.1               |
|                                                             | Archaea                | 44                       | 5.2              | 0.0204          | 0              | 0.0              | 0.0000          | 0                            | 0.0                        | 0.0000          | 4.7               |
|                                                             | Cyanobacteria          | 16                       | 1.9              | 0.0076          | 0              | 0.0              | 0.0000          | 0                            | 0.0                        | 0.0000          | 1.7               |
|                                                             | Chlamydiae/Verrucom.   | 109                      | 13.0             | 0.0508          | 0              | 0.0              | 0.0000          | 1                            | 1.5                        | 0.0005          | 11.8              |
|                                                             | Bacteroidetes/Chlorobi | 28                       | 3.3              | 0.0130          | 0              | 0.0              | 0.0000          | 5                            | 7.5                        | 0.0023          | 3.5               |
|                                                             | Gemmatimonadetes       | 6                        | 0.7              | 0.0026          | 0              | 0.0              | 0.0000          | 0                            | 0.0                        | 0.0000          | 0.6               |
|                                                             | Planctomycetes         | 24                       | 2.8              | 0.0112          | 22             | 91.7             | 0.0102          | 8                            | 12.0                       | 0.0037          | 5.8               |
|                                                             | Firmicutes             | 13                       | 1.5              | 0.0058          | 0              | 0.0              | 0.0000          | 0                            | 0.0                        | 0.0000          | 1.3               |
|                                                             | Aquificae              | 10                       | 1.2              | 0.0046          | 0              | 0.0              | 0.0000          | 0                            | 0.0                        | 0.0000          | 1.1               |
|                                                             | Actinobacteria         | 11                       | 1.2              | 0.0049          | 0              | 0.0              | 0.0000          | 0                            | 0.0                        | 0.0000          | 1.1               |
|                                                             | Chloroflexi            | 30                       | 3.5              | 0.0138          | 0              | 0.0              | 0.0000          | 0                            | 0.0                        | 0.0000          | 3.2               |
|                                                             | Deinococcus-Thermus    | 7                        | 0.8              | 0.0033          | 0              | 0.0              | 0.0000          | 0                            | 0.0                        | 0.0000          | 0.7               |
|                                                             | Acidobacteria          | 5                        | 0.6              | 0.0023          | 0              | 0.0              | 0.0000          | 0                            | 0.0                        | 0.0000          | 0.5               |
|                                                             | Lentisphaera           | 1                        | 0.1              | 0.0005          | 0              | 0.0              | 0.0000          | 0                            | 0.0                        | 0.0000          | 0.1               |
|                                                             | Spirochaetes           | 2                        | 0.2              | 0.0007          | 0              | 0.0              | 0.0000          | 0                            | 0.0                        | 0.0000          | 0.2               |
| Unknown/unclassified                                        | 41                     | 4.8                      | 0.0190           | 0               | 0.0            | 0.0000           | 0               | 0.0                          | 0.0000                     | 4.4             |                   |
|                                                             | Σ                      | 844                      | 100.0            | 0.3921          | 24             | 100.0            | 0.0112          | 67                           | 100.0                      | 0.0310          | 100.0             |
| 200m                                                        | Alphaproteobacteria    | 492                      | 45.8             | 0.1791          | 0              | 0.0              | 0.0000          | 42                           | 41.8                       | 0.0153          | 43.8              |
|                                                             | Betaproteobacteria     | 86                       | 8.0              | 0.0314          | 1              | 2.9              | 0.0005          | 3                            | 3.0                        | 0.0011          | 7.4               |
|                                                             | Gammaproteobacteria    | 170                      | 15.9             | 0.0620          | 3              | 7.0              | 0.0012          | 20                           | 19.9                       | 0.0073          | 15.9              |
|                                                             | Deltaproteobacteria    | 22                       | 2.0              | 0.0080          | 0              | 0.0              | 0.0000          | 2                            | 2.0                        | 0.0007          | 2.0               |
|                                                             | Archaea                | 4                        | 0.4              | 0.0015          | 0              | 0.0              | 0.0000          | 0                            | 0.0                        | 0.0000          | 0.3               |
|                                                             | Cyanobacteria          | 9                        | 0.9              | 0.0033          | 0              | 0.0              | 0.0000          | 0                            | 0.0                        | 0.0000          | 0.8               |
|                                                             | Chlamydiae/Verrucom.   | 93                       | 8.7              | 0.0339          | 0              | 0.0              | 0.0000          | 0                            | 0.0                        | 0.0000          | 7.6               |
|                                                             | Bacteroidetes/Chlorobi | 24                       | 2.2              | 0.0086          | 0              | 0.0              | 0.0000          | 1                            | 1.0                        | 0.0004          | 2.0               |
|                                                             | Gemmatimonadetes       | 3                        | 0.3              | 0.0011          | 0              | 0.0              | 0.0000          | 0                            | 0.0                        | 0.0000          | 0.2               |
|                                                             | Planctomycetes         | 51                       | 4.8              | 0.0186          | 41             | 90.1             | 0.0149          | 32                           | 31.3                       | 0.0115          | 10.1              |
|                                                             | Firmicutes             | 6                        | 0.6              | 0.0022          | 0              | 0.0              | 0.0000          | 0                            | 0.0                        | 0.0000          | 0.5               |
|                                                             | Aquificae              | 28                       | 2.6              | 0.0102          | 0              | 0.0              | 0.0000          | 0                            | 0.0                        | 0.0000          | 2.3               |
|                                                             | Actinobacteria         | 3                        | 0.2              | 0.0009          | 0              | 0.0              | 0.0000          | 0                            | 0.0                        | 0.0000          | 0.2               |
|                                                             | Chloroflexi            | 18                       | 1.7              | 0.0066          | 0              | 0.0              | 0.0000          | 0                            | 0.0                        | 0.0000          | 1.5               |
|                                                             | Deinococcus-Thermus    | 9                        | 0.8              | 0.0033          | 0              | 0.0              | 0.0000          | 0                            | 0.0                        | 0.0000          | 0.7               |
|                                                             | Acidobacteria          | 4                        | 0.4              | 0.0015          | 0              | 0.0              | 0.0000          | 0                            | 0.0                        | 0.0000          | 0.3               |
|                                                             | Lentisphaera           | 2                        | 0.2              | 0.0007          | 0              | 0.0              | 0.0000          | 1                            | 1.0                        | 0.0004          | 0.2               |
| Deferribacteres                                             | 1                      | 0.1                      | 0.0004           | 0               | 0.0            | 0.0000           | 0               | 0.0                          | 0.0000                     | 0.1             |                   |
| Unknown/unclassified                                        | 49                     | 4.6                      | 0.0180           | 0               | 0.0            | 0.0000           | 0               | 0.0                          | 0.0000                     | 4.1             |                   |
|                                                             | Σ                      | 1073                     | 100.0            | 0.3911          | 46             | 100.0            | 0.0166          | 101                          | 100.0                      | 0.0366          | 100.0             |

| Chilean OMZ<br>Metatranscriptome<br>(MOOMZ-1, station 3<br>20.12°S/70.38°W) |                         | Low-affinity cyt oxidase |                        |                       | Cyt bd oxidase      |                        |                       | Cyt cbb <sub>3</sub> oxidase |                      |                       | All                     |
|-----------------------------------------------------------------------------|-------------------------|--------------------------|------------------------|-----------------------|---------------------|------------------------|-----------------------|------------------------------|----------------------|-----------------------|-------------------------|
|                                                                             |                         | RNA<br>hit<br>count      | % of<br>cyt ox<br>hits | % of<br>total<br>hits | RNA<br>hit<br>count | % of<br>cyt bd<br>hits | % of<br>total<br>hits | RNA<br>hit<br>count          | % of<br>cbb3<br>hits | % of<br>total<br>hits | % of<br>all cyt<br>hits |
| 50m                                                                         | Alphaproteobacteria     | 29                       | 24.3                   | 0.0426                | 0                   | 0.0                    | 0.0000                | 0                            | 0.0                  | 0.0000                | 21.8                    |
|                                                                             | Betaproteobacteria      | 1                        | 0.8                    | 0.0005                | 0                   | 0.0                    | 0.0000                | 1                            | 100.0                | 0.0005                | 1.5                     |
|                                                                             | Gammaproteobacteria     | 23                       | 19.3                   | 0.0151                | 0                   | 0.0                    | 0.0000                | 0                            | 0.0                  | 0.0000                | 17.3                    |
|                                                                             | Archaea                 | 22                       | 18.5                   | 0.0141                | 0                   | 0.0                    | 0.0000                | 0                            | 0.0                  | 0.0000                | 16.5                    |
|                                                                             | Cyanobacteria           | 5                        | 4.2                    | 0.0020                | 0                   | 0.0                    | 0.0000                | 0                            | 0.0                  | 0.0000                | 3.8                     |
|                                                                             | Chlamydiae/Verrucom.    | 26                       | 21.9                   | 0.0105                | 0                   | 0.0                    | 0.0000                | 0                            | 0.0                  | 0.0000                | 19.6                    |
|                                                                             | Gemmatimonadetes        | 3                        | 2.5                    | 0.0020                | 0                   | 0.0                    | 0.0000                | 0                            | 0.0                  | 0.0000                | 2.3                     |
|                                                                             | Planctomycetes          | 1                        | 0.8                    | 0.0015                | 13                  | 100.0                  | 0.0005                | 0                            | 0.0                  | 0.0000                | 10.5                    |
|                                                                             | Chloroflexi             | 2                        | 1.7                    | 0.0029                | 0                   | 0.0                    | 0.0000                | 0                            | 0.0                  | 0.0000                | 1.5                     |
|                                                                             | Deinococcus-Thermus     | 1                        | 0.8                    | 0.0010                | 0                   | 0.0                    | 0.0000                | 0                            | 0.0                  | 0.0000                | 0.8                     |
|                                                                             | Unknown/unclassified    | 6                        | 5.0                    | 0.0074                | 0                   | 0.0                    | 0.0000                | 0                            | 0.0                  | 0.0000                | 4.5                     |
| Σ                                                                           | 119                     | 100.0                    | 0.0996                 | 13                    | 100.0               | 0.0005                 | 1                     | 100.0                        | 0.0005               | 100.0                 |                         |
| 85m                                                                         | Alphaproteobacteria     | 11                       | 26.8                   | 0.0255                | 0                   | 0.0                    | 0.0000                | 1                            | 100.0                | 0.0060                | 24.9                    |
|                                                                             | Betaproteobacteria      | 5                        | 12.7                   | 0.0045                | 0                   | 0.0                    | 0.0000                | 0                            | 0.0                  | 0.0000                | 10.8                    |
|                                                                             | Gammaproteobacteria     | 9                        | 23.6                   | 0.0136                | 0                   | 0.0                    | 0.0000                | 0                            | 0.0                  | 0.0000                | 20.0                    |
|                                                                             | Archaea                 | 2                        | 5.1                    | 0.0141                | 0                   | 0.0                    | 0.0000                | 0                            | 0.0                  | 0.0000                | 4.3                     |
|                                                                             | Chlamydiae/Verrucom.    | 5                        | 12.7                   | 0.0140                | 0                   | 0.0                    | 0.0000                | 0                            | 0.0                  | 0.0000                | 10.8                    |
|                                                                             | Bacterioidetes/Chlorobi | 1                        | 2.5                    | 0.0015                | 0                   | 0.0                    | 0.0000                | 0                            | 0.0                  | 0.0000                | 2.2                     |
|                                                                             | Planctomycetes          | 0                        | 0.0                    | 0.0000                | 6                   | 100.0                  | 0.0029                | 0                            | 0.0                  | 0.0000                | 13.0                    |
|                                                                             | Chloroflexi             | 2                        | 5.1                    | 0.0021                | 0                   | 0.0                    | 0.0000                | 0                            | 0.0                  | 0.0000                | 4.3                     |
|                                                                             | Unknown/unclassified    | 5                        | 11.5                   | 0.0066                | 0                   | 0.0                    | 0.0000                | 0                            | 0.0                  | 0.0000                | 9.7                     |
|                                                                             | Σ                       | 39                       | 100.0                  | 0.0818                | 6                   | 100.0                  | 0.0029                | 1                            | 100.0                | 0.0060                | 100.0                   |
| 110m                                                                        | Alphaproteobacteria     | 75                       | 31.3                   | 0.0516                | 0                   | 0.0                    | 0.0000                | 9                            | 70.4                 | 0.0042                | 29.6                    |
|                                                                             | Betaproteobacteria      | 11                       | 4.7                    | 0.0118                | 0                   | 0.0                    | 0.0000                | 1                            | 9.4                  | 0.0030                | 4.4                     |
|                                                                             | Gammaproteobacteria     | 30                       | 12.5                   | 0.0267                | 0                   | 0.0                    | 0.0000                | 1                            | 11.8                 | 0.0005                | 11.2                    |
|                                                                             | Deltaproteobacteria     | 2                        | 0.8                    | 0.0074                | 0                   | 0.0                    | 0.0000                | 1                            | 8.3                  | 0.0023                | 1.1                     |
|                                                                             | Archaea                 | 31                       | 12.9                   | 0.0046                | 0                   | 0.0                    | 0.0000                | 0                            | 0.0                  | 0.0000                | 11.0                    |
|                                                                             | Chlamydiae/Verrucom.    | 59                       | 24.3                   | 0.0309                | 0                   | 0.0                    | 0.0000                | 0                            | 0.0                  | 0.0000                | 20.7                    |
|                                                                             | Gemmatimonadetes        | 1                        | 0.4                    | 0.0016                | 0                   | 0.0                    | 0.0000                | 0                            | 0.0                  | 0.0000                | 0.4                     |
|                                                                             | Planctomycetes          | 1                        | 0.4                    | 0.0005                | 30                  | 100.0                  | 0.0102                | 0                            | 0.0                  | 0.0000                | 11.0                    |
|                                                                             | Aquificae               | 21                       | 8.7                    | 0.0019                | 0                   | 0.0                    | 0.0000                | 0                            | 0.0                  | 0.0000                | 7.4                     |
|                                                                             | Deinococcus-Thermus     | 1                        | 0.4                    | 0.0005                | 0                   | 0.0                    | 0.0000                | 0                            | 0.0                  | 0.0000                | 0.4                     |
|                                                                             | Unknown/unclassified    | 9                        | 3.5                    | 0.0139                | 0                   | 0.0                    | 0.0000                | 0                            | 0.0                  | 0.0000                | 3.0                     |
| Σ                                                                           | 241                     | 100.0                    | 0.1513                 | 30                    | 100.0               | 0.0102                 | 12                    | 100.0                        | 0.0100               | 100.0                 |                         |
| 200m                                                                        | Alphaproteobacteria     | 202                      | 46.8                   | 0.1500                | 0                   | 0.0                    | 0.0000                | 2                            | 24.4                 | 0.0050                | 45.5                    |
|                                                                             | Betaproteobacteria      | 57                       | 13.2                   | 0.0233                | 0                   | 0.0                    | 0.0000                | 4                            | 51.2                 | 0.0007                | 13.6                    |
|                                                                             | Gammaproteobacteria     | 98                       | 22.6                   | 0.0463                | 0                   | 0.0                    | 0.0000                | 1                            | 12.2                 | 0.0022                | 22.0                    |
|                                                                             | Deltaproteobacteria     | 4                        | 0.8                    | 0.0040                | 0                   | 0.0                    | 0.0000                | 0                            | 0.0                  | 0.0000                | 0.8                     |
|                                                                             | Cyanobacteria           | 1                        | 0.2                    | 0.0004                | 0                   | 0.0                    | 0.0000                | 0                            | 0.0                  | 0.0000                | 0.2                     |
|                                                                             | Chlamydiae/Verrucom.    | 24                       | 5.6                    | 0.0223                | 0                   | 0.0                    | 0.0000                | 0                            | 0.0                  | 0.0000                | 5.3                     |
|                                                                             | Bacterioidetes/Chlorobi | 2                        | 0.5                    | 0.0009                | 0                   | 0.0                    | 0.0000                | 0                            | 0.0                  | 0.0000                | 0.4                     |
|                                                                             | Planctomycetes          | 6                        | 1.3                    | 0.0038                | 9                   | 100.0                  | 0.0149                | 1                            | 12.2                 | 0.0098                | 3.5                     |
|                                                                             | Aquificae               | 18                       | 4.2                    | 0.0075                | 0                   | 0.0                    | 0.0000                | 0                            | 0.0                  | 0.0000                | 4.0                     |
|                                                                             | Chloroflexi             | 4                        | 0.8                    | 0.0026                | 0                   | 0.0                    | 0.0000                | 0                            | 0.0                  | 0.0000                | 0.8                     |
|                                                                             | Deinococcus-Thermus     | 1                        | 0.1                    | 0.0007                | 0                   | 0.0                    | 0.0000                | 0                            | 0.0                  | 0.0000                | 0.1                     |
|                                                                             | Deferribacteres         | 1                        | 0.2                    | 0.0004                | 0                   | 0.0                    | 0.0000                | 0                            | 0.0                  | 0.0000                | 0.2                     |
|                                                                             | Unknown/unclassified    | 16                       | 3.7                    | 0.0082                | 0                   | 0.0                    | 0.0000                | 0                            | 0.0                  | 0.0000                | 3.6                     |
|                                                                             | Σ                       | 432                      | 100.0                  | 0.2704                | 9                   | 100.0                  | 0.0149                | 8                            | 100.0                | 0.0178                | 100.0                   |
